# Supplementary material
Source: Research Square preprint supplement (doi:10.21203/rs.3.rs-9553358/v1)
Supplement: Supplementary file 1 [file 1b909a10f15e9456e65c75b1.xlsx]

## Sheet: Table 2
	TableⅡ Association between use of glucocorticoid and complications
	Complications				Univariate analysis				Multivariable analysis
		n		OR	95% CI	P-value		OR	95% CI	χ2 statics	P-value
	Dislocation	194		1.43	1.043 to 1.906	< 0.05		1.167	0.776 to 1.756	0.553	0.45
	Infection	200		1.129	0.854 to 1.493	0.434		1.025	0.771 to 1.363	0.03	0.862
	Periprosthetic fracture	61		1.776	1.052 to 2.997	< 0.05		1.377	0.800 to 2.372	1.361	0.243
	Wound dehiscence	26		0.733	0.337 to 1.597	0.557		0.697	0.319 to 1.525	0.826	0.363
	Reoperation	359		1.635	1.319 to 2.027	< 0.001		1.73	1.264 to 2.366	12.11	< 0.001
	Hospital-acquired pneumonia	58		1.524	0.890 to 2.580	0.147		1.475	0.868 to 2.505	2.106	0.147
	DVT	836		0.932	0.812 to 1.071	0.34		0.929	0.809 to 1.068	1.074	0.3
	PE	33		1.2	0.605 to 2.383	0.728		1.19	0.598 to 2.366	0.245	0.62
	Cardiac event	5		0.667	0.111 to 3.990	0.999		0.565	0.092 to 3.475	0.389	0.533
	Cerebrovascular event	41		1.564	0.835 to 2.931	0.211		1.52	0.809 to 2.286	1.73	0.188
	Acute renal failure	6		0.5	0.092 to 2.730	0.688		0.51	0.093 to 2.788	0.639	0.424
	Mortality during hospitalization	14		1.801	0.603 to 5.375	0.424		1.693	0.555 to 5.169	0.888	0.346
	P-values of < 0.05 are considered significant by the χ2 test
	OR; Odds Ratio, CI; Confidence Interval, DVT; Deep Vein Thrombosis, PE; Pulmonary Embolism.
