# Supplementary material
Source: Research Square preprint supplement (doi:10.21203/rs.3.rs-9553358/v1)
Supplement: Supplementary file 2 [file 328e630009974a08e747fd0d.xlsx]

## Sheet: Table 1
	Table 1 Baseline demographic data.
			Before PS matching				After PS matching
	Covariate	GC group	Non-GC group	P-value		GC group	Non-GC group	SMD
	n	11057	15764			9577	9577
	Age	59.1 ± 15.0	60.6 ± 14.6	< 0.001※		60.1 ± 14.6	60.1 ± 14.8	0.003
	Gender (%)
	Men	4341 (39.3)	8394 (53.3)	< 0.001		4177 (43.6)	5400 (56.4)	0.017
	Women	6716 (60.7)	7370 (46.7)			4098 (42.8)	5479 (57.2)
	BMI	23.2 ± 4.1	23.3 ± 4.0	0.167※		23.2 ± 4.0	23.2 ± 4.1	0.004
	Surgical side (%)
	Unilateral	10736 (97.1)	321 (2.9)	< 0.001		9341 (97.5)	9354 (97.7)	0.009
	Bilateral	15456 (98.1)	308 (1.9)			236 (2.5)	223 (2.3)
	General anesthesia	8092 (73.2)	12090 (76.7)	< 0.001		7120 (74.4)	7103 (74.2)	0.004
	CCI	0.98 ± 1.12	0.64 ± 1.03	< 0.001※		0.84 ± 1.02	0.82 ± 1.15	0.017
	Smoking	4074 (36.9)	6772 (43.0)	< 0.001		3735 (39.0)	3712 (38.8)	0.005
	Use of bone cement	1785 (16.1)	2517 (16.0)	0.698		1553 (16.2)	1525 (15.9)	0.007
	CAOS	3097 (28.0)	3704 (23.5)	< 0.001		2564 (26.8)	2601 (27.2)	0.009
	Noncovariate	GC group	Non-GC group	P-value		GC group	Non-GC group	P-value
	Length of hospital stay	25.6 ± 16.3	26.7 ± 15.8	< 0.001※		25.5 ± 16.4	26.6 ± 15.8	< 0.001
	Medications (%)
	Anticoagulate agent	7891 (71.4)	11282 (71.6)	0.721		6858 (71.6)	6812 (71.1)	0.472
	Antiplatelet agent	1081 (9.8)	1134 (7.2)	< 0.001		886 (9.3)	747 (7.8)	< 0.001
	Comorbidities (%)
	Hypertension	1729 (15.6)	2366 (15.0)	0.163		1540 (16.1)	1472 (15.4)	0.184
	Diabetes	1630 (14.7)	1632 (10.4)	< 0.001		1286 (13.4)	1175 (12.3)	< 0.05
	Nephrotic syndrome	255 (2.3)	57 (0.4)	< 0.001		221 (2.3)	37 (0.4)	< 0.001
	leukemia	85 (0.8)	56 (0.4)	< 0.001		63 (0.7)	56 (0.6)	0.581
	SLE	1101 (10.0)	127 (0.8)	< 0.001		743 (7.8)	118 (1.2)	< 0.001
	Vasculitis	199 (1.8)	14 (0.1)	< 0.001		184 (1.9)	7 (0.1)	< 0.001
	Other collagen diseases	930 (8.4)	111 (0.7)	< 0.001		748 (7.8)	88 (0.9)	< 0.001
	Age, BMI, CCI, and length of hospital stay are shown as mean ± standard deviation
	P-values of <0.05 are considered significant by the Student-t test andχ2 test
	GC:glucocorticoid, SMD; Standardized Mean Difference, BMI: Boby Mass Index, CCI; Charlson Cormobidity Index, CAS; Computer-assisted orthopedic surgery, SLE; systemic lupus erythematosus.
	※ Student-t test
