# Supplementary material
Source: Research Square preprint supplement (doi:10.21203/rs.3.rs-9553358/v1)
Supplement: Supplementary file 3 [file 3a93040e73b0b8f85bbe81d7.xlsx]

## Sheet: Table 3
	Table Ⅲ Multivariate logistic analysis of risk factors for re-operation.
	Variable	OR	95% CI	χ2 statics	P-value
	Age	1.011	1.003 to 1.020	7.47971	< 0.01
	Gender (Female)	1.326	0.592 to 0.960	5.22253	< 0.05
	BMI	0.996	0.970 to 1.023	0.0661756	0.797
	General anesthesia	0.94	0.742 to 1.190	0.262843	0.6082
	CCI	1.158	1.053 to 1.267	8.90985	< 0.01
	Smoking	1.083	0.852 to 1.375	0.421329	0.5163
	Use of bone cement	1.026	0.776 to 1.355	0.0314609	0.8592
	CAOS	0.723	0.558 to 0.937	6.38823	< 0.05
	Hypertension	0.823	0.609 to 1.111	1.68173	0.1947
	Diabetes	0.795	0.567 to 1.108	1.92779	0.165
	Nephrotic syndrome	1.287	0.599 to 2.767	0.389196	0.5327
	Leukemia	0	-	5.30552	0.213
	SLE	0.885	0.520 to 1.505	0.210052	0.6467
	Vasculitis	0.42	0.104 to 1.705	1.97484	0.1599
	Other collagen diseases	0.734	0.433 to 1.252	1.38717	0.2389
	Glucocorticoid	1.705	1.367 to 2.126	22.88	< 0.001
	P-values of < 0.05 are considered significant by the χ2 test;
	OR; Odds Ratio, CI; Confidence Interval, BMI: Boby Mass Index, CCI; Charlson Comobidity Index, CAOS; Computer-assisted orthopedic surgery, SLE; systemic lupus erythematosus.
