# Supplementary material
Source: Research Square preprint supplement (doi:10.21203/rs.3.rs-9553358/v1)
Supplement: Supplementary file 4 [file b8f8efbd72958c877467a109.xlsx]

## Sheet: Table 4
	Table IV. Types of Reoperation Performed After THA
	Type of reoperation	GC group n (%)	Non-GC group n (%)	OR	95% CI	P-value
	Debridement / irrigation	15 (4.2)	8 (2.2)	1.168	0.482 to 2.833	0.827
	Closed reduction	96 (26.7)	71 (19.8)	0.708	0.462 to 1.086	0.128
	Open reduction	9 (2.5)	6 (1.7)	0.923	0.321 to 2.651	0.999
	Revision arthroplasty	87 (24.2)	44 (32.1)	1.362	0.869 to 2.133	0.214
	ORIF	15 (4.2)	8 (2.2)	1.168	0.482 to 2.833	0.827
	P-values of < 0.05 are considered significant by the χ2 test;
	OR; Odds Ratio, CI; Confidence Interval, ORIF; open reduction and internal fixation.
